# Supplementary material
Source: publisher figshare collection journal article supplement (https://geolsoc.figshare.com/ndownloader/files/16124924)
Supplement: Supplementary file 1 [file 16124924]

## Sheet: Sheet1
Date	Loc #	Locality	Sample #	Image #	Easting	Northing	Notes
2016-06-07	1.1	Borve Peninsula	-	1522-51	0590216	6316469	Pseudotachylyte breccia; en echelon fractures; pseud generation along contacts; displ across pseud
			1				Almost pure pseud melt
			2				Almost pure pseud melt
			3				Pseud melt + mafic country rock
			4				Felsic country rock
			5				Pseud melt
			6				Felsic country rock
			7				Pseud melt + mafic country rock
			8				Pseud melt + mafic country rock
2016-06-07	1.2	Borve Peninsula	9	1557-64	0590264	6317004	Pseud melt + country rock; large sample
			10				Pseud melt in mafic gneiss
			11				Pseud melt + country rock; large sample
2016-06-11	2.1	S. of Eaval	12	1593,94	0605806	6378049	Pseud. Heaving lichen covered outcrops. Poor exposure of band
	2.2	S. of Eaval	-	1596,97	0608469	6377344	Pseud veins displ. By top-to-NW thrusting
	2.3	Eaval	13	1601-04	0608590	6377435	Pure pseud - pervasive pseud veining
			14				Mafic target rocks
			15				Altered gneiss
	2.4	Eaval	16	1605,06	0609693	6378957	Foliated gneiss
	2.5	Eaval	17	1607-13	0609749	6379090	Pseud + pegmatite wall rock
			18				Pseud
			19				Green pseud. + mafic wall rock
			20				Green pseud. + pegmatite wall rock
			21				Pegmatite wall rock
			22				Gneiss wall rock
	2.6		23	1617-22	0609708	6379174	Pure pseud
	2.7		24	1623-29	0609507	6379221	Pseud
	2.8		25	1630-34	0609508	6379203	Black pseud
			26				Black pseud
			27				Black pseud + wall rock
